# Supplementary material for: Avifaunal Diversity and Abundance in the Proposed Sarasalai Mangrove Reserve, Jaffna, Sri Lanka
Source: MDPI journal article supplement (doi:10.3390/birds4010009), 2023-02-17
Supplement: s1 [file s1]

**Table S1.** Pairwise comparison of Sorensen Coefficient index.

| Kruskal Wallis-test - Z-Values |        |        |        |        |        |        |        |        |        |
|--------------------------------|--------|--------|--------|--------|--------|--------|--------|--------|--------|
|                                |        | Site A | Site B | Site C | Site D | Site E | Site F | Site G | Site H |
| Sorensen Coefficient           | Site A |        | 1.67   | -0.43  | -1.42  | -1.67  | -1.3   | 0.93   | 1.3    |
|                                | Site B | 0.937  |        | -0.19  | -0.93  | -0.8   | -1.55  | 1.05   | 1.55   |
|                                | Site C | 0.844  | 0.862  |        | -0.06  | 0.19   | 0.8    | 1.42   | 0.68   |
|                                | Site D | 0.809  | 0.827  | 0.87   |        | 1.18   | -0.31  | 0.56   | -0.68  |
|                                | Site E | 0.789  | 0.83   | 0.874  | 0.905  |        | 0.43   | -0.56  | -1.18  |
|                                | Site F | 0.812  | 0.807  | 0.888  | 0.851  | 0.877  |        | 0.06   | -1.05  |
|                                | Site G | 0.898  | 0.904  | 0.926  | 0.878  | 0.836  | 0.872  |        | 0.31   |
|                                | Site H | 0.92   | 0.927  | 0.88   | 0.833  | 0.814  | 0.826  | 0.876  |        |

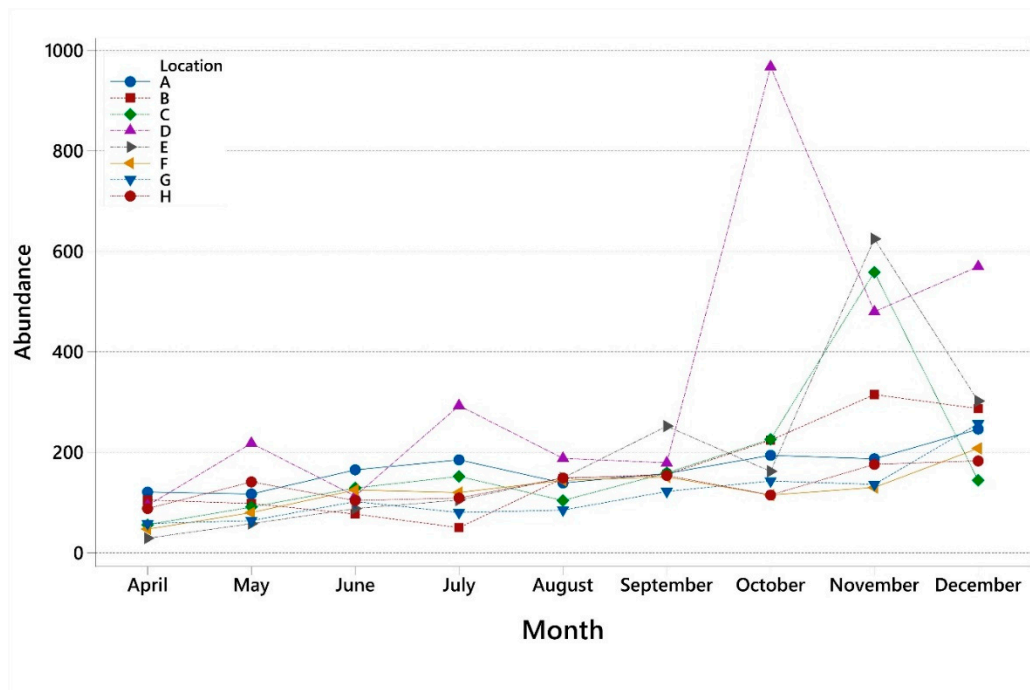

**Figure S1.** Monthly variation of bird abundance in different sampling points in Sarasalai proposed mangrove

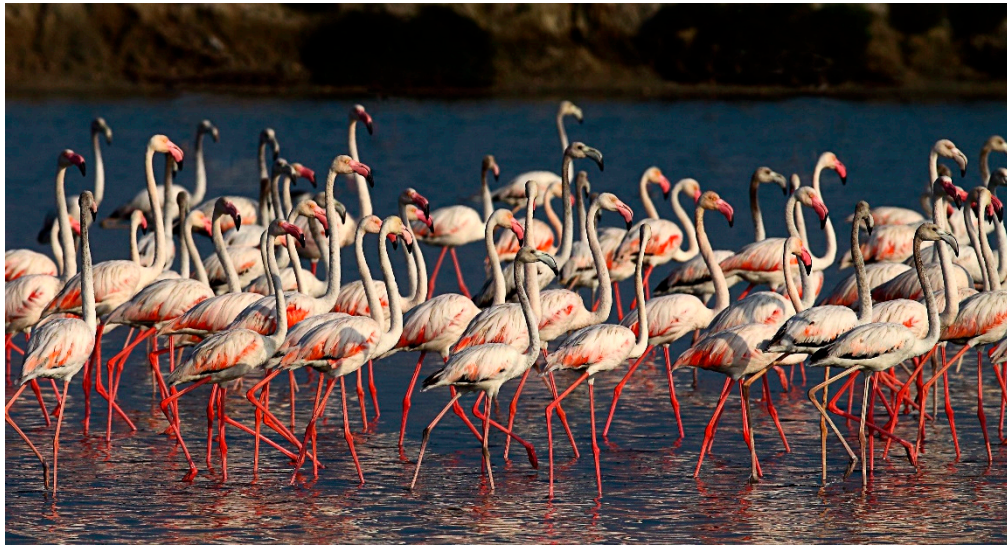

**Figure S2.** A flock of Greater Flamingos in Sarasalai mangrove.

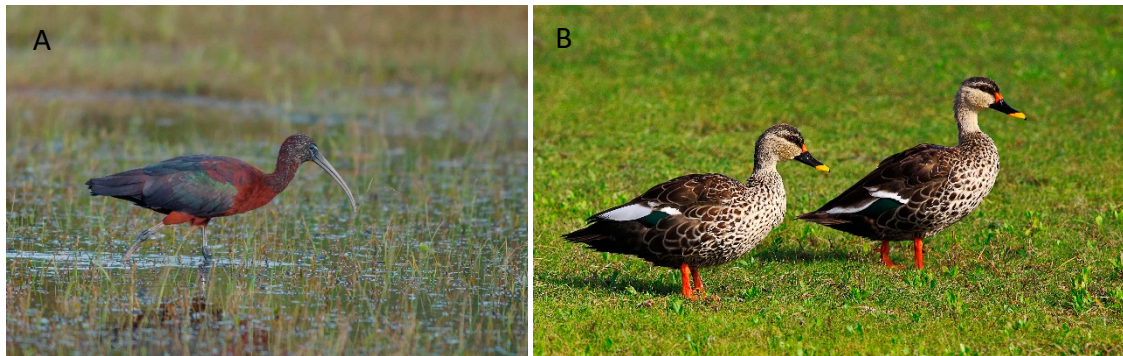

**Figure S3.** Two rare and nationally threatened birds from Sarasalai mangrove (A; Glossy Ibis, B; Indian Spot-billed Duck).

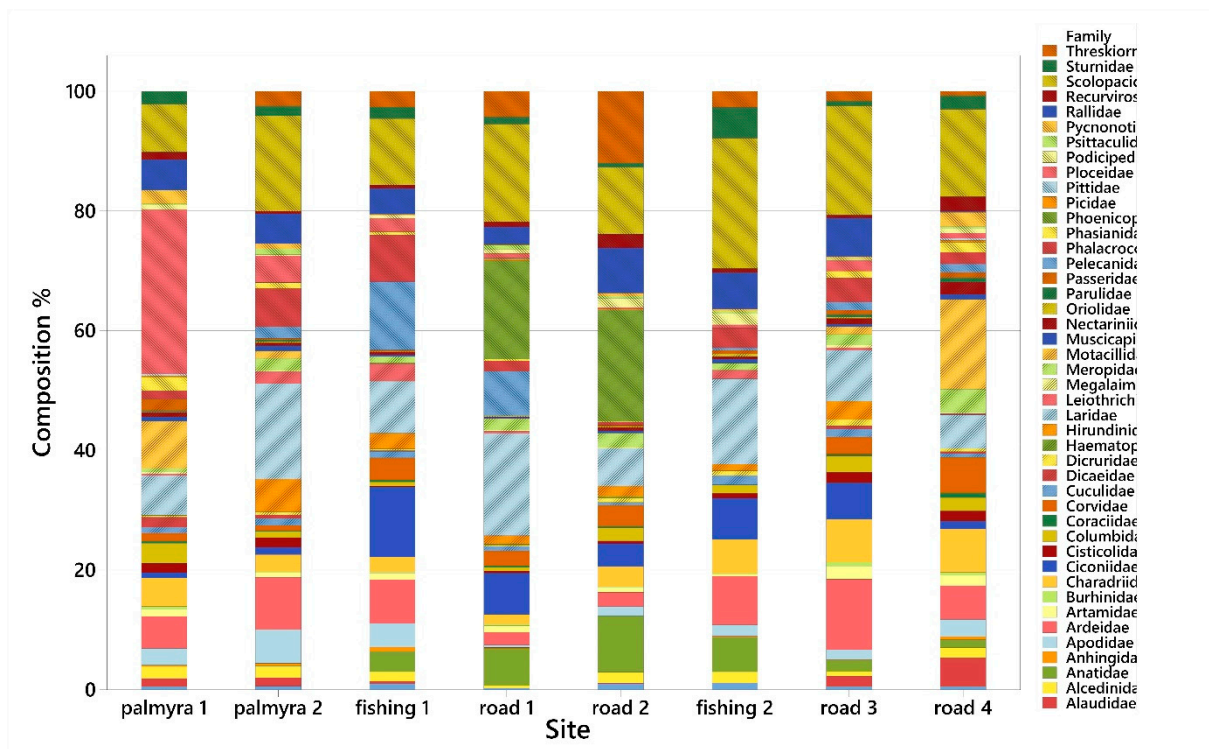

**Figure S4.** Composition of birds in eight locations in Sarasalai proposed mangrove.
